CORRECTION

## Correction: The impact of the radical urbanization index on depression risk among middle-aged and elderly Chinese: Evidence from a large-scale cross-sectional study

Yuting Li, Diege Long, Zhen Ye

There is an error in affiliation 1 for author Yuting Li. The correct affiliation 1 is: The Traditional Chinese Medicine Hospital of Longquanyi, Chengdu.

### Reference

1. Li Y, Long D, Ye Z. The impact of the radical urbanization index on depression risk among middle-aged and elderly Chinese: Evidence from a large-scale cross-sectional study. PLoS One. 2026;21(4):e0338329. <https://doi.org/10.1371/journal.pone.0338329> PMID: [41931487](https://pubmed.ncbi.nlm.nih.gov/41931487/)

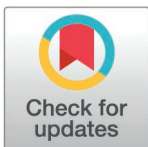

### OPEN ACCESS

**Citation:** Li Y, Long D, Ye Z (2026) Correction: The impact of the radical urbanization index on depression risk among middle-aged and elderly Chinese: Evidence from a large-scale cross-sectional study. PLoS One 21(5): e0348900. <https://doi.org/10.1371/journal.pone.0348900>

**Published:** May 5, 2026

**Copyright:** © 2026 Li et al. This is an open access article distributed under the terms of the [Creative Commons Attribution License](https://creativecommons.org/licenses/by/4.0/), which permits unrestricted use, distribution, and reproduction in any medium, provided the original author and source are credited.
